# Supplementary material for: Metal-free synthesis of quinazolinones without any additives in water
Source: Royal Society of Chemistry journal article supplement (doi:10.1039/c6ra05777b), 2016-01-01

**General Methods.** Unless otherwise noted, materials obtained from commercial suppliers were used without further purification.  $^1\text{H-NMR}$  spectra were recorded on 300 MHz or 400 MHz NMR spectrometers. Chemical shifts (in ppm) were referenced to tetramethylsilane ( $\delta = 0$  ppm) in  $\text{CDCl}_3$  or  $\text{d}^6\text{-DMSO}$  as an internal standard.  $^{13}\text{C-NMR}$  spectra were obtained by using the same NMR spectrometers and were calibrated with  $\text{CDCl}_3$  or  $\text{d}^6\text{-DMSO}$ .

### Experimental procedures and characterization datas of compounds

To a screw-cap vial containing a stir bar, a mixture of **1** (0.3 mmol) and **2** (0.6 mmol) was added in pure water (2 mL). The reaction vial was fitted with a cap. The reaction vial was heated with stirring at 120-130 °C for 24 hours. After cooling down to room temperature and concentrated in vacuum, the residue was purified by flash chromatography on a short silica gel to provide the terminal product **3** and **4**.

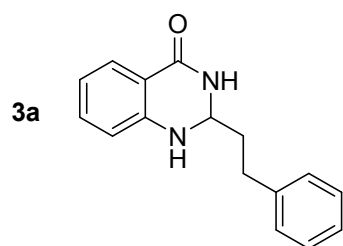

**2-phenethyl-2,3-dihydroquinazolinone (3a).**<sup>[1]</sup> **1a** (40.8 mg, 0.3 mmol), **2a** (80.4 mg, 0.6 mmol). **3a** (8 mg, 11%, n-hexane/ethyl acetate = 3:1): white solid;  $^1\text{H NMR}$  (300 MHz,  $\text{CDCl}_3$ )  $\delta$  7.89 (dd,  $J = 7.8, 1.2$  Hz, 1H), 7.34-7.21 (m, 5H), 6.85 (t,  $J = 7.5$  Hz, 2H), 6.59 (d,  $J = 8.1$  Hz, 1H), 4.92 (t,  $J = 5.6$  Hz, 1H), 3.60 (s, br, 1H), 2.92-2.73 (m, 2H), 2.16-2.09 (m, 2H).  $^{13}\text{C NMR}$  (75 MHz,  $\text{CDCl}_3$ )  $\delta$  165.3, 147.2, 140.3, 133.8, 128.8, 128.5, 128.4, 126.5, 119.4, 115.9, 114.8, 65.1, 37.1, 30.5.

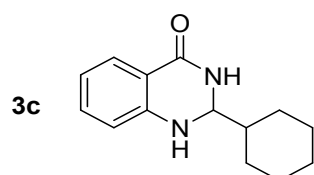

**2-cyclohexyl-2,3-dihydroquinazolinone (3c).**<sup>[2]</sup> **1a** (40.8 mg, 0.3 mmol), **2c** (67.2 mg, 0.6 mmol). **3c** (23 mg, 34%, n-hexane/ethyl acetate = 3:1): white solid;  $^1\text{H NMR}$  (300 MHz,  $\text{DMSO}$ )  $\delta$  7.91 (s, 1H), 7.56 (dd,  $J = 7.7, 1.1$  Hz, 1H), 7.25 – 7.13 (m, 1H), 6.74

(d,  $J = 8.1$  Hz, 1H), 6.63-6.56 (m, 2H), 4.45 (s, 1H), 1.70-1.12 (m, 11H).  $^{13}\text{C}$  NMR (75 MHz, DMSO)  $\delta$  164.2, 148.8, 133.5, 127.7, 116.9, 115.3, 114.6, 69.0, 43.3, 27.5, 27.2, 26.4, 26.1, 26.0.

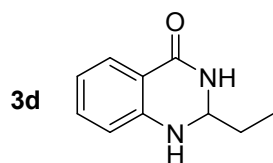

**2-ethyl-2,3-dihydroquinazolinone (3d).**<sup>[3]</sup> **1a** (40.8 mg, 0.3 mmol), **2d** (69.6 mg, 1.2 mmol). **3d** (11 mg, 21%, n-hexane/ethyl acetate = 1:1): white solid;  $^1\text{H}$  NMR (300 MHz, DMSO)  $\delta$  7.86 (s, 1H), 7.57 (d,  $J = 7.7$  Hz, 1H), 7.27 – 7.17 (m, 1H), 6.72 (d,  $J = 7.9$  Hz, 1H), 6.65 (t,  $J = 7.4$  Hz, 1H), 6.55 (s, 1H), 4.65 (t,  $J = 5.0$  Hz, 1H), 1.73 – 1.55 (m, 2H), 0.93 (t,  $J = 7.4$  Hz, 3H).  $^{13}\text{C}$  NMR (75 MHz, DMSO)  $\delta$  164.5, 149.1, 133.5, 127.9, 117.4, 115.5, 114.8, 65.9, 28.3, 8.6.

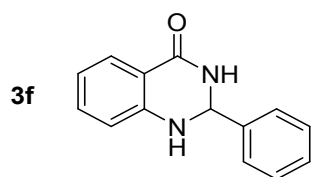

**2-phenyl-2,3-dihydroquinazolinone (3f).**<sup>[1]</sup> **1a** (40.8 mg, 0.3 mmol), **2f** (63.6 mg, 0.6 mmol). **3f** (58 mg, 86%, n-hexane/ethyl acetate = 1:1): white solid;  $^1\text{H}$  NMR (300 MHz, DMSO)  $\delta$  8.27 (s, br, 1H), 7.60 (d,  $J = 7.5$  Hz, 1H), 7.49 (d,  $J = 8.1$  Hz, 2H), 7.42-7.34 (m, 3H), 7.24 (t,  $J = 7.5$  Hz, 1H), 7.10 (s, br, 1H), 6.74 (d,  $J = 8.1$  Hz, 1H), 6.67 (t,  $J = 7.8$  Hz, 1H), 5.75 (s, 1H);  $^{13}\text{C}$  NMR (75 MHz, DMSO)  $\delta$  162.6, 153.1, 148.7, 135.2, 132.9, 132.0, 129.1, 128.8, 128.3, 127.6, 126.4, 121.4.

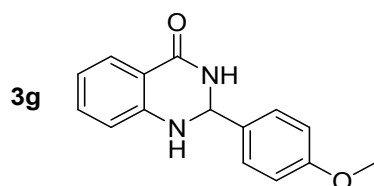

**2-(4-methoxyphenyl)-2,3-dihydroquinazolinone (3g).**<sup>[2]</sup> **1a** (40.8 mg, 0.3 mmol), **2g** (81.6 mg, 0.6 mmol). **3g** (21 mg, 27%, n-hexane/ethyl acetate = 1:2): white solid;  $^1\text{H}$

NMR (300 MHz, DMSO)  $\delta$  8.20 (s, 1H), 7.61 (d,  $J = 7.6$  Hz, 1H), 7.42 (d,  $J = 8.6$  Hz, 2H), 7.30 – 7.16 (m, 1H), 7.02 (s, 1H), 6.95 (d,  $J = 8.7$  Hz, 2H), 6.74 (d,  $J = 8.1$  Hz, 1H), 6.67 (t,  $J = 7.4$  Hz, 1H), 5.71 (s, 1H), 3.75 (s, 3H);  $^{13}\text{C}$  NMR (75 MHz, DMSO)  $\delta$  164.2, 159.9, 148.5, 133.9, 133.7, 128.7, 127.8, 117.6, 115.5, 114.9, 114.1, 66.8, 55.6.

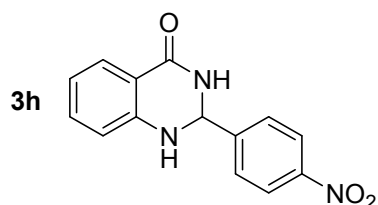

**2-(4-nitrophenyl)-2,3-dihydroquinazolinone (3h).**<sup>[4]</sup> **1a** (40.8 mg, 0.3 mmol), **2h** (90.6 mg, 0.6 mmol). **3h** (51 mg, 63%, n-hexane/ethyl acetate = 1:1): orange solid;  $^1\text{H}$  NMR (300 MHz, DMSO)  $\delta$  8.52 (s, 1H), 8.25 (d,  $J = 8.8$  Hz, 2H), 7.74 (d,  $J = 8.7$  Hz, 2H), 7.65 – 7.55 (m, 1H), 7.32 (s, 1H), 7.30 – 7.20 (m, 1H), 6.77 (d,  $J = 8.0$  Hz, 1H), 6.69 (t,  $J = 7.5$  Hz, 1H), 5.91 (s, 1H);  $^{13}\text{C}$  NMR (75 MHz, DMSO)  $\delta$  163.8, 149.8, 147.9, 147.7, 134.0, 128.5, 127.9, 124.1, 117.9, 115.4, 115.0, 65.7.

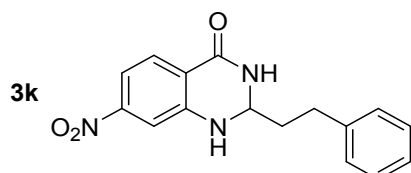

**7-nitro-2-phenethyl-2,3-dihydroquinazolinone (3k).** **1c** (54.3 mg, 0.3 mmol), **2a** (80.4 mg, 0.6 mmol). **3k** (18 mg, 22%, n-hexane/ethyl acetate = 2:1): orange solid;  $^1\text{H}$  NMR (300 MHz, DMSO)  $\delta$  8.46 (s, 1H), 7.81 (d,  $J = 8.5$  Hz, 1H), 7.59 (d,  $J = 2.2$  Hz, 1H), 7.43 (dd,  $J = 8.5, 2.1$  Hz, 1H), 7.38 (s, 1H), 7.33 – 7.14 (m, 5H), 4.86 (t,  $J = 5.0$  Hz, 1H), 2.76-2.74 (m, 2H), 1.98-1.93 (m, 2H);  $^{13}\text{C}$  NMR (75 MHz, DMSO)  $\delta$  162.7, 151.1, 149.3, 141.7, 129.6, 128.9, 128.8, 126.4, 119.8, 111.4, 109.3, 64.4, 37.4, 29.6. HR-MS  $[\text{M}+\text{H}]^+$   $m/z$  calcd for  $\text{C}_{16}\text{H}_{16}\text{N}_3\text{O}_3$  298.11872, found 298.11862.

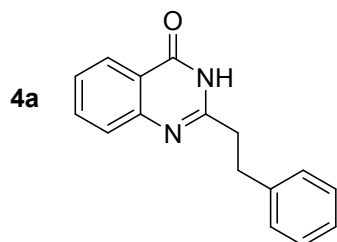

**2-phenethylquinazolin-4(3H)-one (4a).**<sup>[1]</sup> **4a** (55 mg, 73%, n-hexane/ethyl acetate = 3:1): white solid; <sup>1</sup>H NMR (300 MHz, DMSO)  $\delta$  11.78 (s, br, 1H), 8.31 (d,  $J$  = 8.1 Hz, 1H), 7.83-7.73 (m, 2H), 7.50 (t,  $J$  = 7.8 Hz, 1H), 7.36-7.21 (m, 5H), 3.24-3.08 (m, 4H); <sup>13</sup>C NMR (75 MHz, DMSO)  $\delta$  162.2, 157.1, 149.3, 141.2, 134.8, 128.83, 128.81, 127.3, 126.6, 126.5, 126.2, 121.3, 36.8, 32.9.

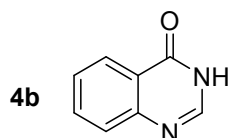

**quinazolin-4(3H)-one (4b).**<sup>[5]</sup> **4b** (30 mg, 68%, n-hexane/ethyl acetate = 1:2): white solid; <sup>1</sup>H NMR (300 MHz, DMSO)  $\delta$  12.25 (s, br, 1H), 8.15 – 8.10 (m, 1H), 8.09 (s, 1H), 7.86 – 7.77 (m, 1H), 7.67 (dd,  $J$  = 8.1, 0.6 Hz, 1H), 7.52 (d,  $J$  = 8.1 Hz, 1H); <sup>13</sup>C NMR (75 MHz, DMSO)  $\delta$  161.2, 149.2, 145.9, 134.8, 127.7, 127.2, 126.3, 123.1.

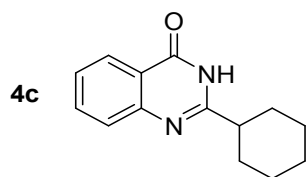

**2-cyclohexylquinazolin-4(3H)-one (4c).**<sup>[6]</sup> **4c** (42 mg, 62%, n-hexane/ethyl acetate = 3:1): white solid; <sup>1</sup>H NMR (300 MHz, CDCl<sub>3</sub>)  $\delta$  11.45 (s, br, 1H), 8.28 (d,  $J$  = 7.6 Hz, 1H), 7.83 – 7.66 (m, 2H), 7.53 – 7.41 (m, 1H), 2.74 (t,  $J$  = 12.0 Hz, 1H), 2.14 – 1.33 (m, 11H); <sup>13</sup>C NMR (75 MHz, CDCl<sub>3</sub>)  $\delta$  164.0, 160.2, 149.4, 134.8, 127.3, 126.4, 126.2, 120.8, 44.8, 30.5, 26.0, 25.7.

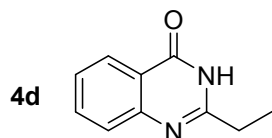

**2-ethyl-quinazolin-4(3H)-one (4d).**<sup>[7]</sup> **4d** (27 mg, 52%, n-hexane/ethyl acetate = 1:1): white solid; <sup>1</sup>H NMR (300 MHz, DMSO)  $\delta$  12.15 (s, br, 1H), 8.08 (dd,  $J = 7.9, 1.3$  Hz, 1H), 7.82 – 7.70 (m, 1H), 7.59 (d,  $J = 7.8$  Hz, 1H), 7.49 – 7.39 (m, 1H), 2.62 (q,  $J = 7.5$  Hz, 2H), 1.24 (t,  $J = 7.5$  Hz, 3H); <sup>13</sup>C NMR (75 MHz, DMSO)  $\delta$  162.3, 158.8, 149.4, 134.8, 127.2, 126.4, 126.2, 121.3, 28.3, 11.8.

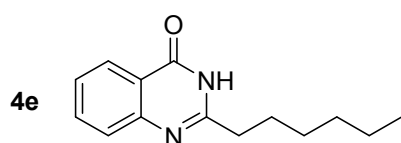

**2-hexyl-quinazolin-4(3H)-one (4e).**<sup>[8]</sup> **4e** (28 mg, 41%, n-hexane/ethyl acetate = 3:1): white solid; <sup>1</sup>H NMR (300 MHz, DMSO)  $\delta$  12.17 (s, br, 1H), 8.07 (dd,  $J = 7.9, 1.3$  Hz, 1H), 7.80 – 7.71 (m, 1H), 7.59 (d,  $J = 7.9$  Hz, 1H), 7.49 – 7.39 (m, 1H), 2.66 – 2.53 (m, 2H), 1.71-0.83 (m, 11H); <sup>13</sup>C NMR (75 MHz, DMSO)  $\delta$  162.3, 158.0, 149.4, 134.7, 127.2, 126.4, 126.2, 121.2, 34.9, 31.4, 28.7, 27.21, 22.4, 14.4.0.

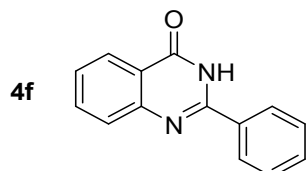

**2-phenyl-quinazolin-4(3H)-one (4f).**<sup>[1]</sup> **4f** (< 5%, n-hexane/ethyl acetate = 3:1): white solid; <sup>1</sup>H NMR (400 MHz, DMSO)  $\delta$  12.53 (s, br, 1H), 8.20-8.15 (m, 3H), 7.84 (t,  $J = 7.2$  Hz, 1H), 7.74 (d,  $J = 8.0$  Hz, 1H), 7.57-7.51 (m, 4H). <sup>13</sup>C NMR (75 MHz, DMSO)  $\delta$  162.7, 152.8, 149.2, 135.1, 133.2, 131.9, 129.1, 128.2, 128.0, 127.1, 126.3, 121.4.

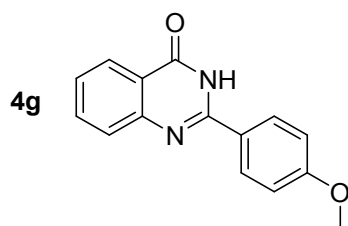

**2-(4-methoxyphenyl)-quinazolin-4(3H)-one (4g).**<sup>[1]</sup> **4g** (54 mg, 71%, n-hexane/ethyl acetate = 1:2): white solid; <sup>1</sup>H NMR (400 MHz, DMSO)  $\delta$  12.40 (s, br, 1H), 8.19 (d,  $J$  = 8.8 Hz, 2H), 8.13 (d,  $J$  = 6.8 Hz, 1H), 7.82 (t,  $J$  = 6.8 Hz, 1H), 7.70 (d,  $J$  = 7.6 Hz, 1H), 7.49 (t,  $J$  = 6.8 Hz, 1H), 7.09 (d,  $J$  = 8.8 Hz, 2H), 3.85 (s, 3H). <sup>13</sup>C NMR (75 MHz, DMSO)  $\delta$  162.8, 162.3, 152.3, 149.4, 135.1, 129.9, 127.8, 126.6, 126.3, 125.3, 121.1, 114.5, 55.9.

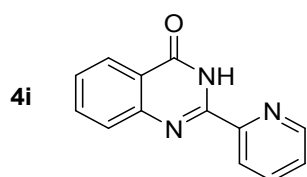

**2-(2-pyridyl)-quinazolin-4(3H)-one (4i).**<sup>[1]</sup> **4i** (26 mg, 39%, n-hexane/ethyl acetate = 2:1): yellow solid; <sup>1</sup>H NMR (300 MHz, CDCl<sub>3</sub>)  $\delta$  10.96 (s, br, 1H), 8.67 (d,  $J$  = 4.5 Hz, 1H), 8.60 (d,  $J$  = 7.9 Hz, 1H), 8.35 (d,  $J$  = 7.7 Hz, 1H), 7.92 (t,  $J$  = 7.8 Hz, 1H), 7.80 (d,  $J$  = 9.9 Hz, 2H), 7.57 – 7.40 (m, 2H). <sup>13</sup>C NMR (75 MHz, CDCl<sub>3</sub>)  $\delta$  161.4, 148.9, 148.8, 148.3, 137.6, 134.6, 127.9, 127.4, 126.8, 126.3, 122.5, 122.1.

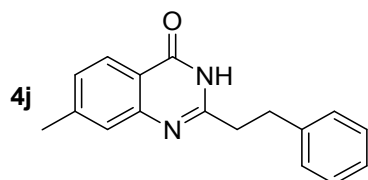

**7-methyl-2-phenylethyl-quinazolin-4(3H)-one (4j).** **4j** (40 mg, 57%, n-hexane/ethyl acetate = 3:1): white solid; <sup>1</sup>H NMR (300 MHz, DMSO)  $\delta$  12.14 (s, br, 1H), 7.96 (d,  $J$  = 8.1 Hz, 1H), 7.43 (s, 1H), 7.34 – 7.23 (m, 5H), 7.22 – 7.14 (m, 1H), 3.04 (dd,  $J$  = 9.4, 6.0 Hz, 2H), 2.88 (dd,  $J$  = 9.3, 6.0 Hz, 2H), 2.44 (s, 3H). <sup>13</sup>C NMR (75 MHz, DMSO)  $\delta$  162.2, 157.1, 149.4, 145.2, 141.2, 128.8, 128.8, 127.9, 126.9, 126.6, 126.1, 118.9, 36.7, 32.9, 21.8. HR-MS [M+H]<sup>+</sup>  $m/z$  calcd for C<sub>17</sub>H<sub>17</sub>N<sub>2</sub>O 265.13352, found 265.13354.

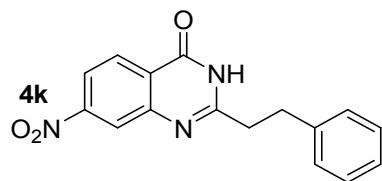

**7-nitro-2-phenylethyl-quinazolin-4(3H)-one (4k).** **4k** (62 mg, 78%, n-hexane/ethyl acetate = 2:1): white solid;  $^1\text{H}$  NMR (400 MHz, DMSO)  $\delta$  12.65 (s, 1H), 8.33 – 8.28 (m, 2H), 8.19 (dd,  $J$  = 8.7, 2.2 Hz, 1H), 7.32 – 7.26 (m, 4H), 7.23 – 7.16 (m, 1H), 3.07 (t,  $J$  = 9.2 Hz, 2H), 2.95 (t,  $J$  = 9.2 Hz, 2H).  $^{13}\text{C}$  NMR (100 MHz, DMSO)  $\delta$  161.3, 159.7, 151.7, 149.7, 141.0, 128.9, 128.8, 128.6, 126.6, 125.7, 122.3, 120.3, 36.7, 32.7. HR-MS  $[\text{M}+\text{H}]^+$   $m/z$  calcd for  $\text{C}_{16}\text{H}_{14}\text{N}_3\text{O}_3$  296.10297, found 296.10293.

#### References:

- [1] B. Q. Hu, L. X. Wang, L. Yang, J. F. Xiang, Y. L. Tang, *Eur. J. Org. Chem.* **2015**, 4504.  
 [2] X. F. Wu, S. Oschatz, A. Block, A. Spannenberg, P. Langer, *Org. Biomol. Chem.* **2014**, *12*, 1865.  
 [3] M. Prakash, S. Jayakumar, V. Kesavan, *Synthesis*, **2013**, *45*, 2265.  
 [4] M. Desroses, M. Scobie, T. Helleday, *New. J. Chem.* **2013**, *37*, 3595.  
 [5] T. Li, M. L. Chen, L. Yang, Z. X. Xiong, Y. W. Wang, F. Li, D. Y. Chen, *Tetrahedron* **2016**, *72*, 868.  
 [6] A. P. Antonchick, L. Burgmann, *Angew. Chem. Int. Ed.* **2013**, *52*, 3267.  
 [7] W. Xu, H. Fu, *J. Org. Chem.* **2011**, *76*, 3846.  
 [8] M. Sharif, J. Opalach, P. Langer, M. Beller, X. F. Wu, *RSC Adv.* **2014**, *4*, 8.

Table S1. Optimization of temperatures for the condensation reaction between *o*-aminobenzamide **1a** and 3-phenylpropanal **2a**.<sup>a</sup>

| Entry | 2a(equiv.) | Temperature (°C) | yield <sup>b</sup> [%] |    |
|-------|------------|------------------|------------------------|----|
|       |            |                  | 3a                     | 4a |
| 1     | 2.0        | 100              | 48                     | 42 |
| 2     | 2.0        | 110              | 33                     | 59 |

<sup>a</sup> Reaction conditions: **1a** (0.3 mmol),  $\text{H}_2\text{O}$ : 2 ml, 24h. <sup>b</sup> Isolated yield.

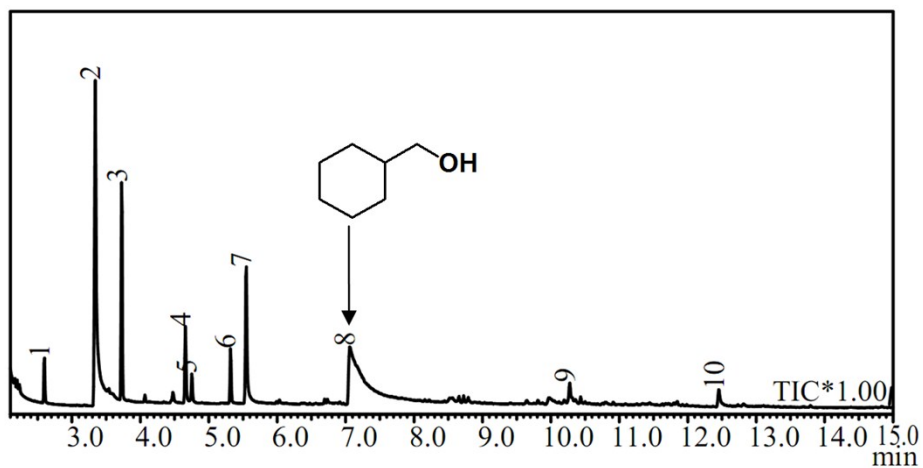

Fig.S1. GC-MS analysis of reaction mixture of entry 3 in Table 2.

NMR spectra of synthetic compounds:

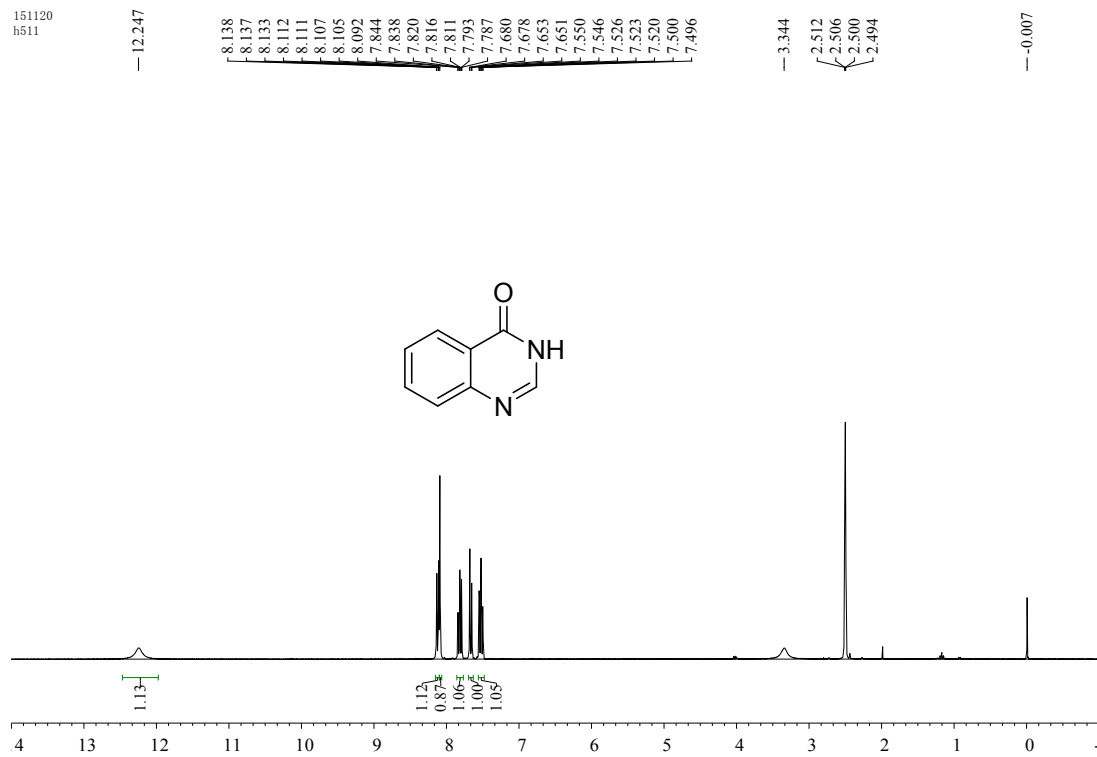



151217  
h-511

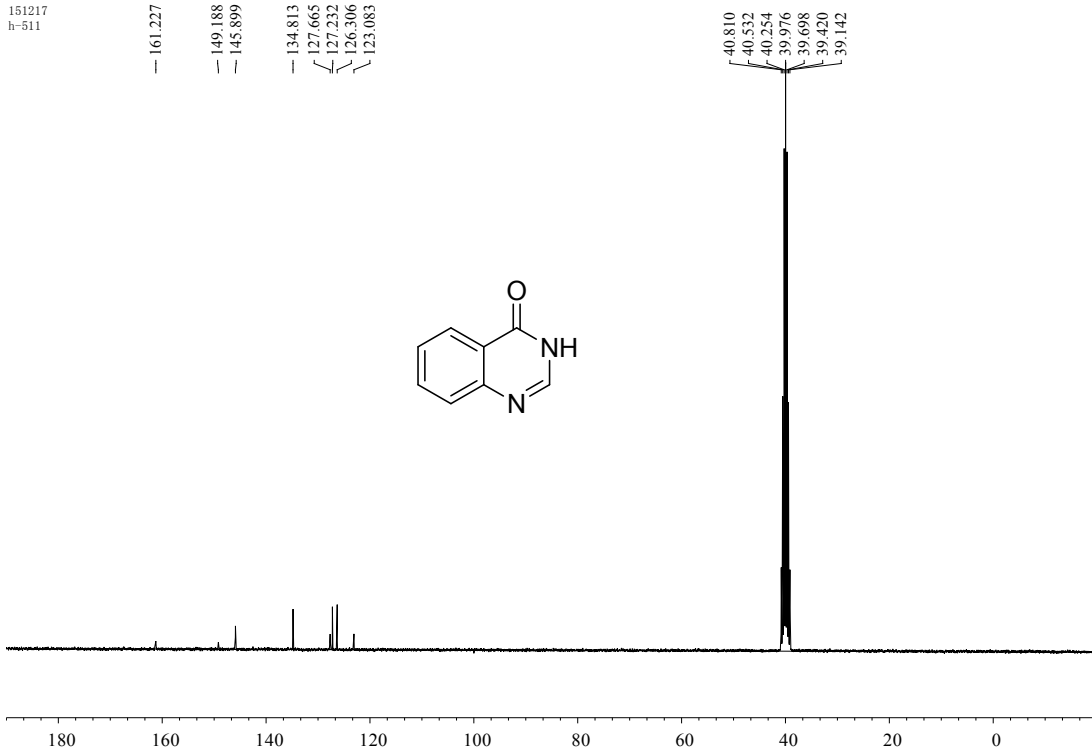

151218  
H-506B

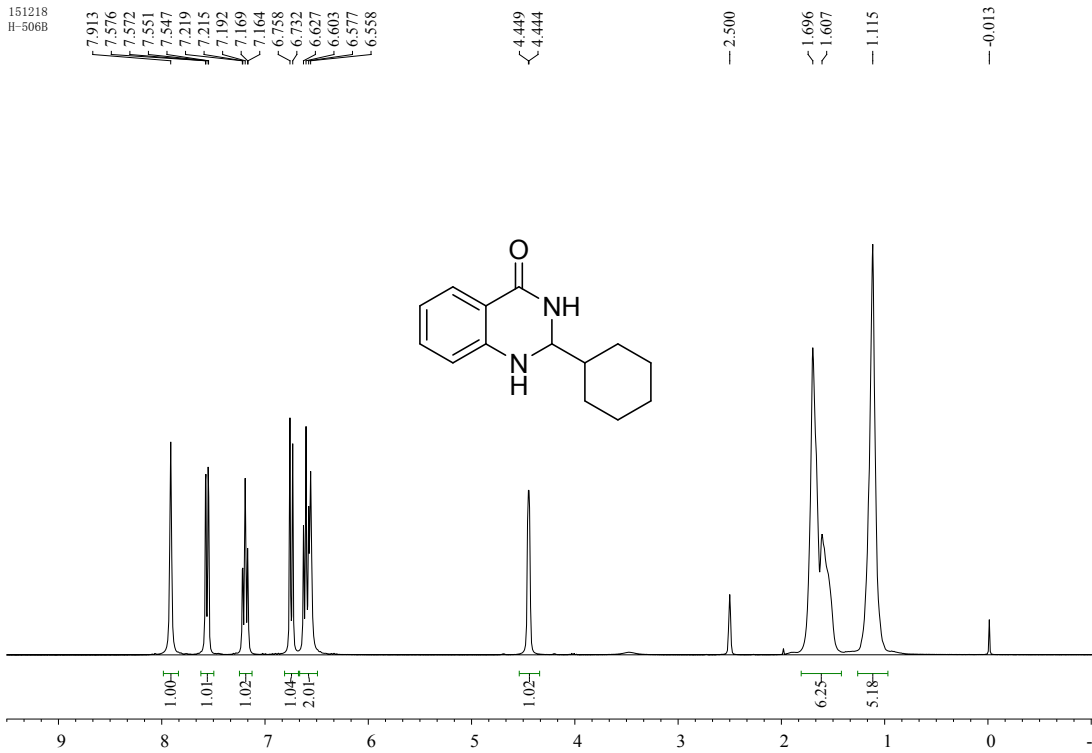

151218  
H-506B

— 164.220  
— 148.833  
— 133.494  
— 127.703  
— 116.881  
— 115.245  
— 114.547  
— 69.042  
— 43.306  
— 40.793  
— 40.513  
— 40.234  
— 39.956  
— 39.678  
— 39.400  
— 39.121  
— 27.463  
— 27.147  
— 26.409  
— 26.088  
— 26.026

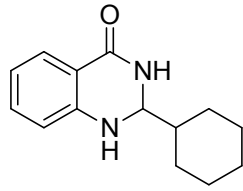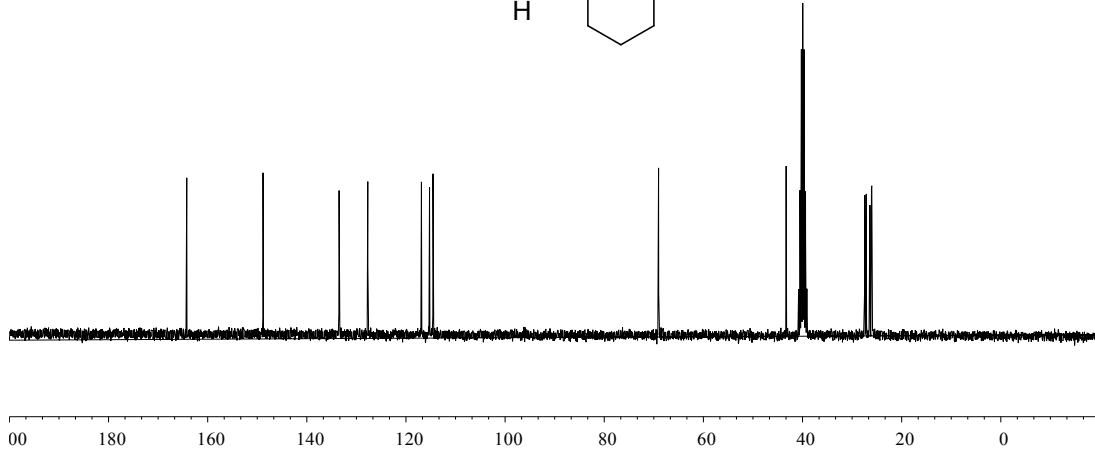

151120  
h506a

— 11.453  
— 8.292  
— 8.266  
— 7.797  
— 7.793  
— 7.770  
— 7.766  
— 7.743  
— 7.735  
— 7.709  
— 7.495  
— 7.490  
— 7.469  
— 7.447  
— 7.442  
— 7.260  
— 2.782  
— 2.743  
— 2.703  
— 2.081  
— 2.043  
— 1.910  
— 1.818  
— 1.781  
— 1.732  
— 1.437  
— 1.422  
— 1.004

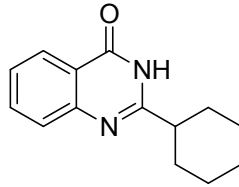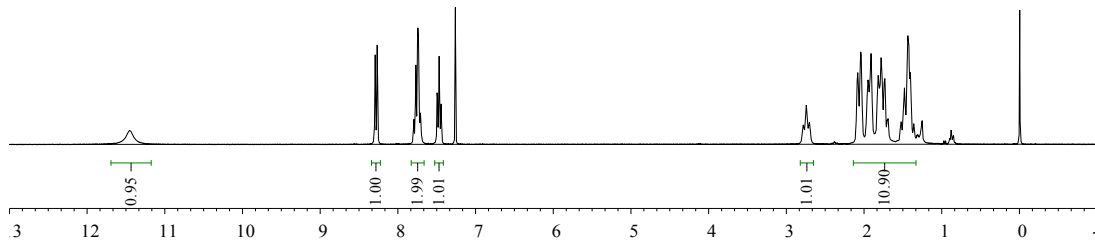

151120  
h506a

164.029  
160.187

149.379

134.755  
127.290  
126.368  
126.233  
120.755

77.459  
77.238  
77.035  
76.612

44.812

30.529  
26.002  
25.716

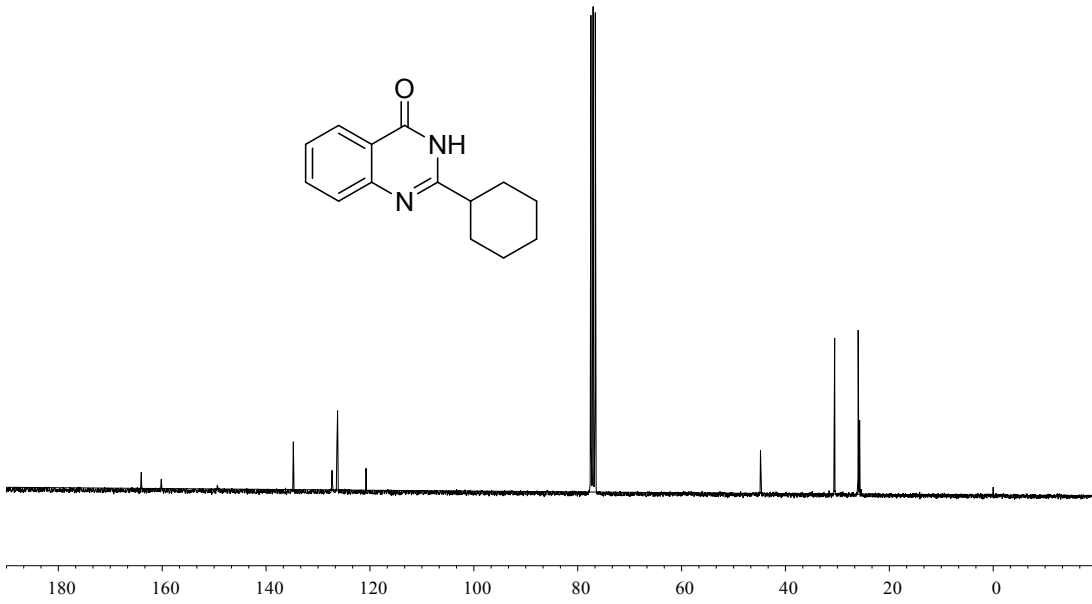

hbq  
h-505b

7.860  
7.588  
7.584  
7.563  
7.558  
7.249  
7.243  
7.221  
7.198  
7.192  
6.734  
6.707  
6.672  
6.647  
6.623  
6.546

4.668  
4.652  
4.635

3.307

2.500

1.664  
1.646  
1.639  
1.622  
1.597  
0.959  
0.935  
0.910

-0.000

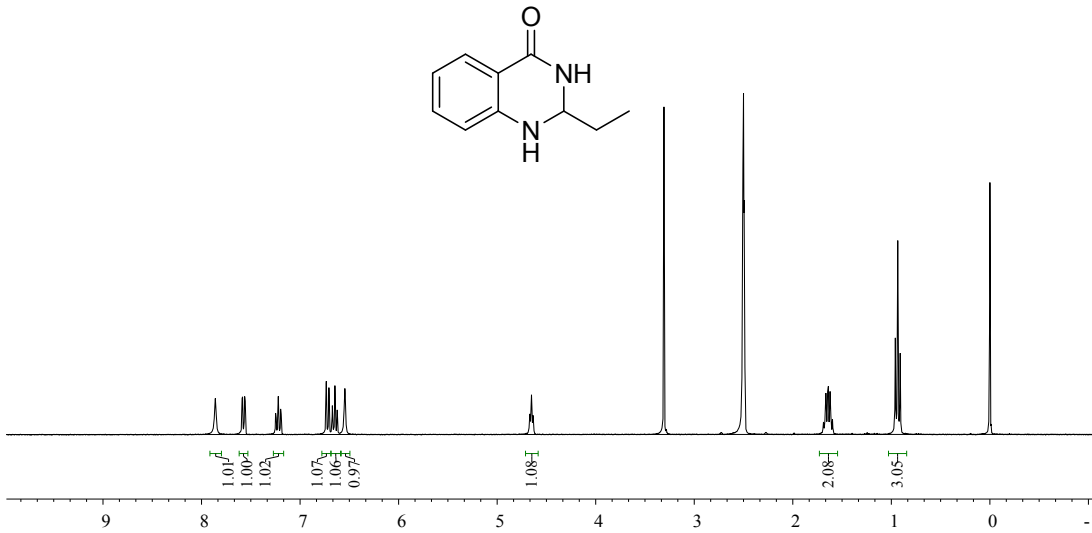

13C  
13C NMR  
wang lixia  
20151222

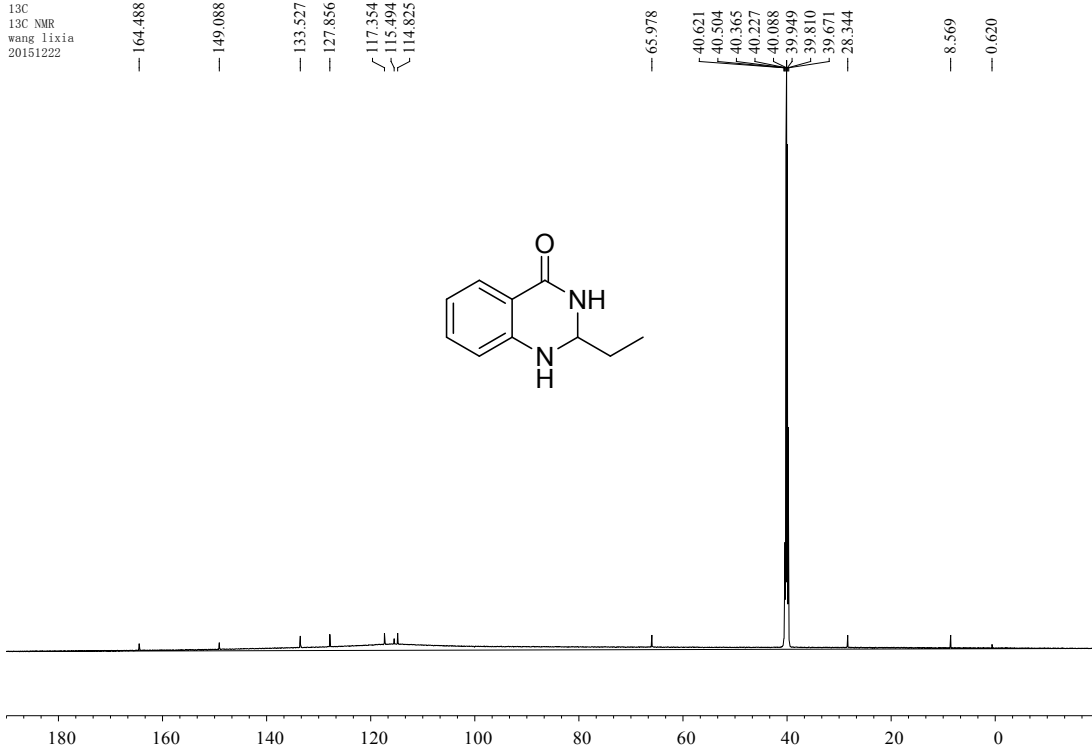

hbq  
h-505a

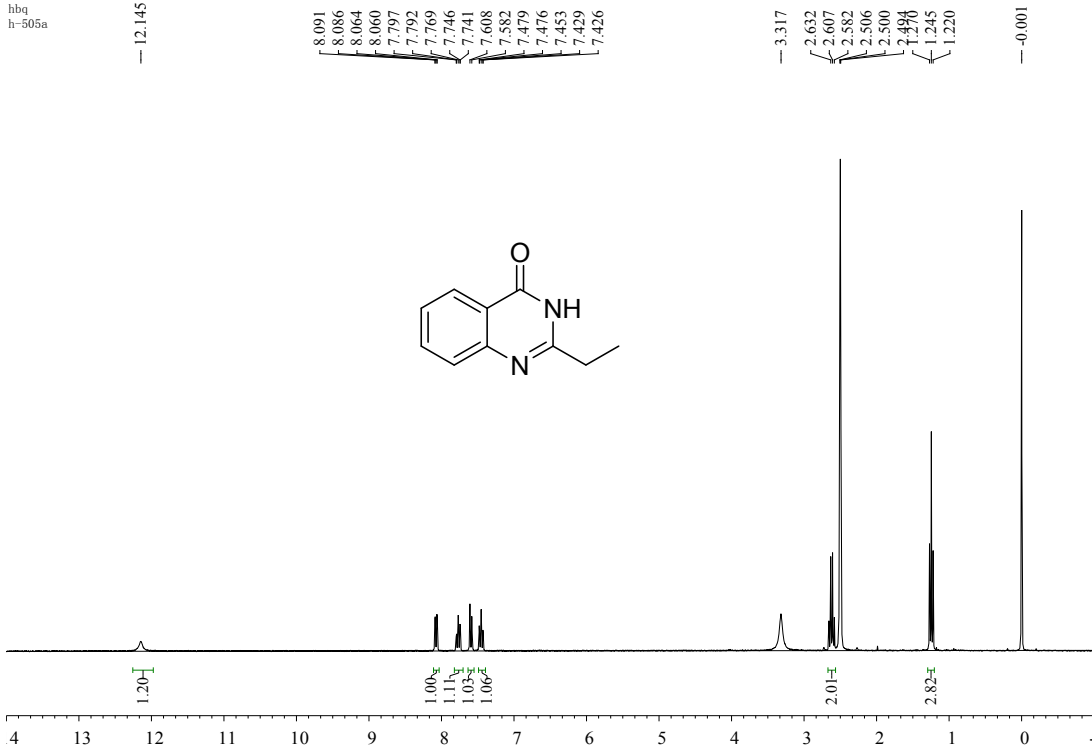

151216  
h-505a

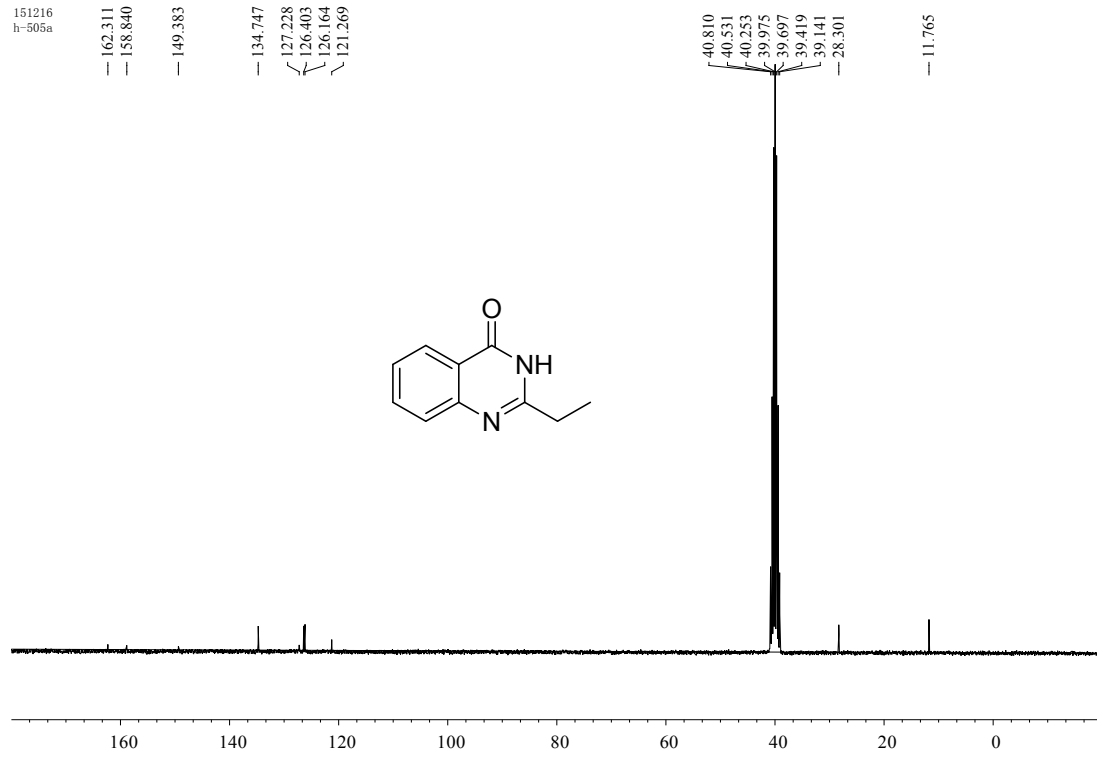

151222  
h-508

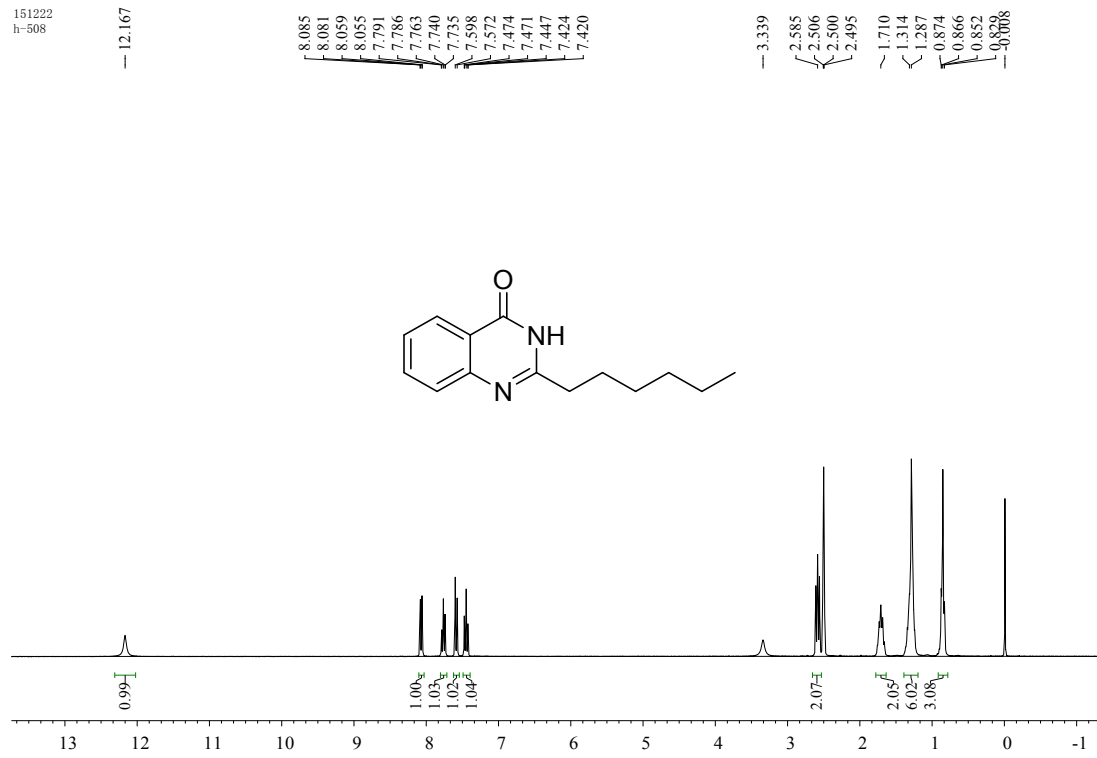

151222  
h-508

- 162.310
- 158.018
- 149.400
- 134.736
- 127.219
- 126.366
- 126.146
- 121.221
- 40.821
- 40.543
- 40.264
- 39.986
- 39.708
- 39.430
- 39.152
- 34.967
- 31.398
- 28.659
- 27.210
- 22.422
- 14.385

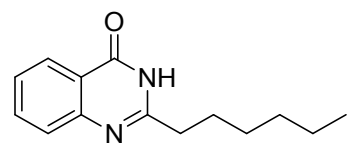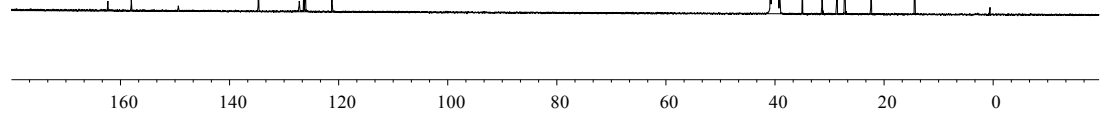

151218  
H-522B

- 8.202
- 7.627
- 7.602
- 7.436
- 7.407
- 7.239
- 7.021
- 6.961
- 6.933
- 6.755
- 6.729
- 6.699
- 6.578
- 5.703
- 3.745
- 2.500
- 0.003

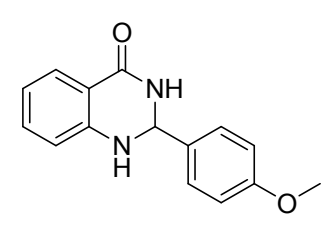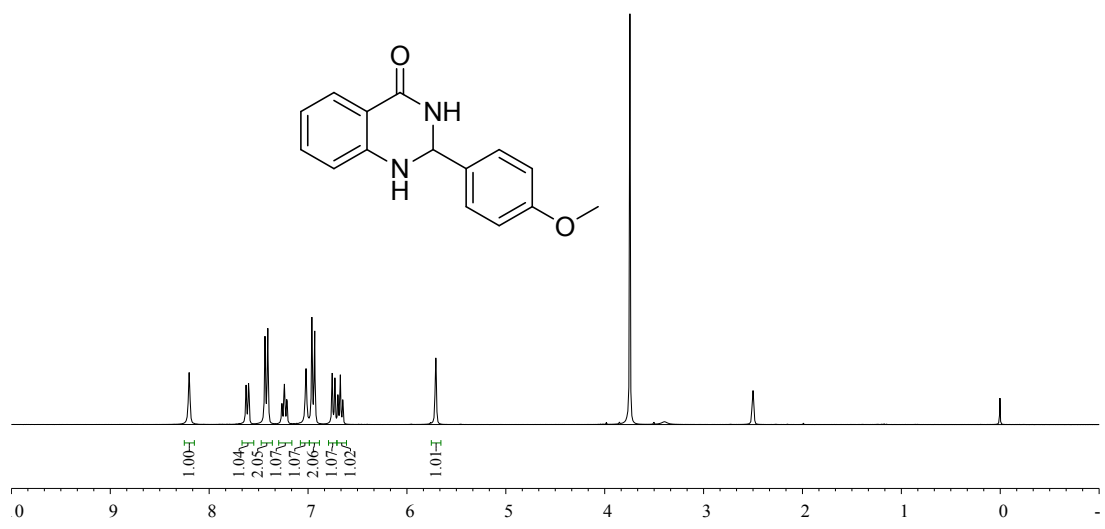

151218  
H-522B

164.184  
159.898  
148.501  
133.912  
133.716  
128.698  
127.818  
117.558  
115.469  
114.881  
114.097  
66.774  
55.637  
40.800  
40.523  
40.245  
39.967  
39.689  
39.411  
39.132

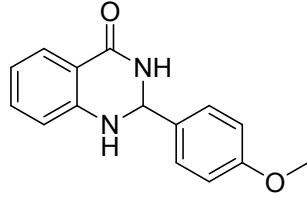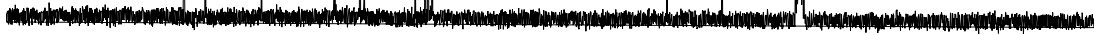

00 180 160 140 120 100 80 60 40 20 0

151128  
h-521

8.516  
8.269  
8.239  
7.753  
7.724  
7.618  
7.596  
7.325  
6.778  
6.752  
6.713  
6.687  
3.330  
2.505  
2.500  
-0.004

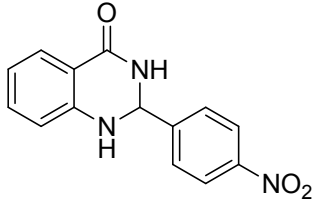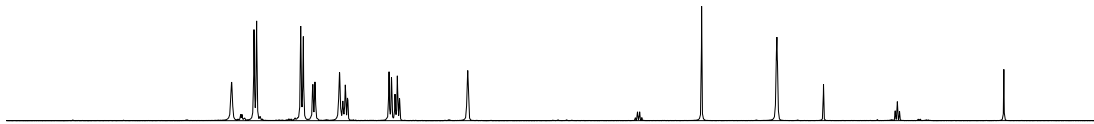

1 10 9 8 7 6 5 4 3 2 1 0

151217  
h-521

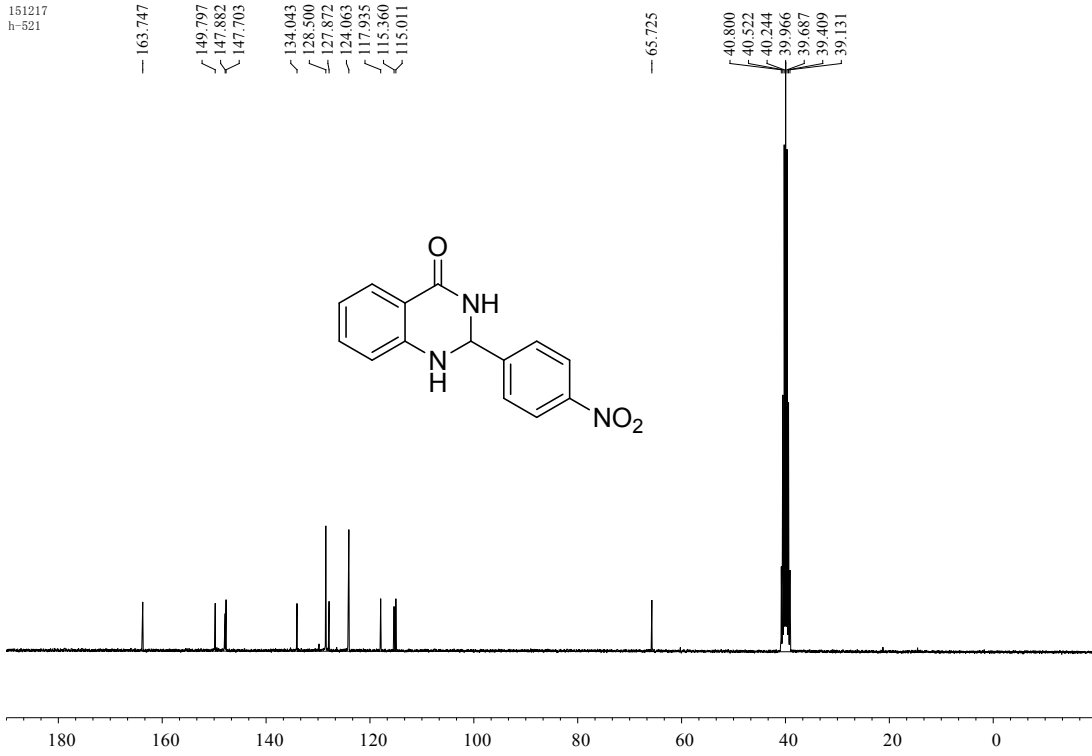

151120  
h519a

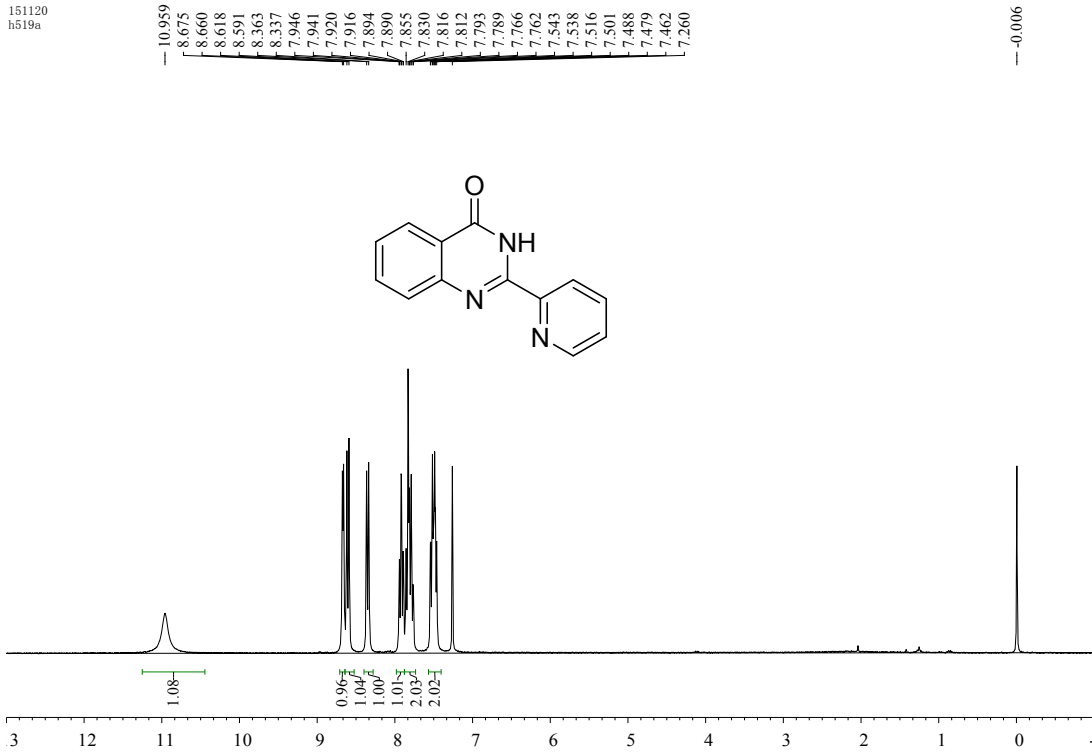



151120  
h519a

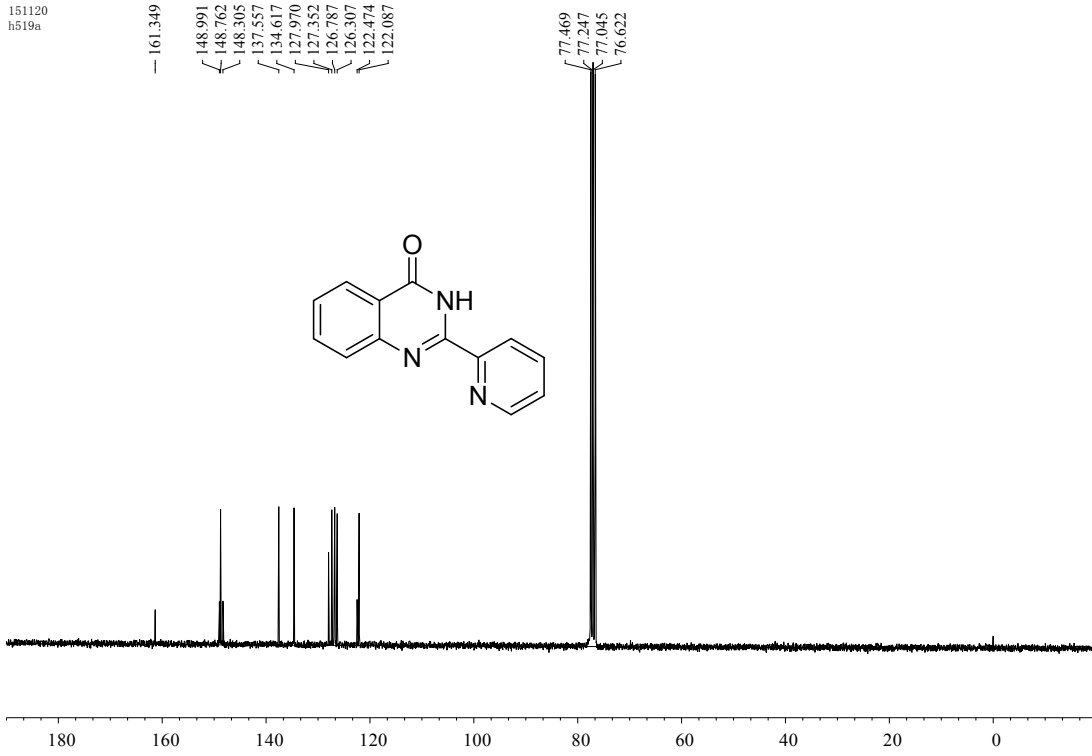

hbq  
h-510a

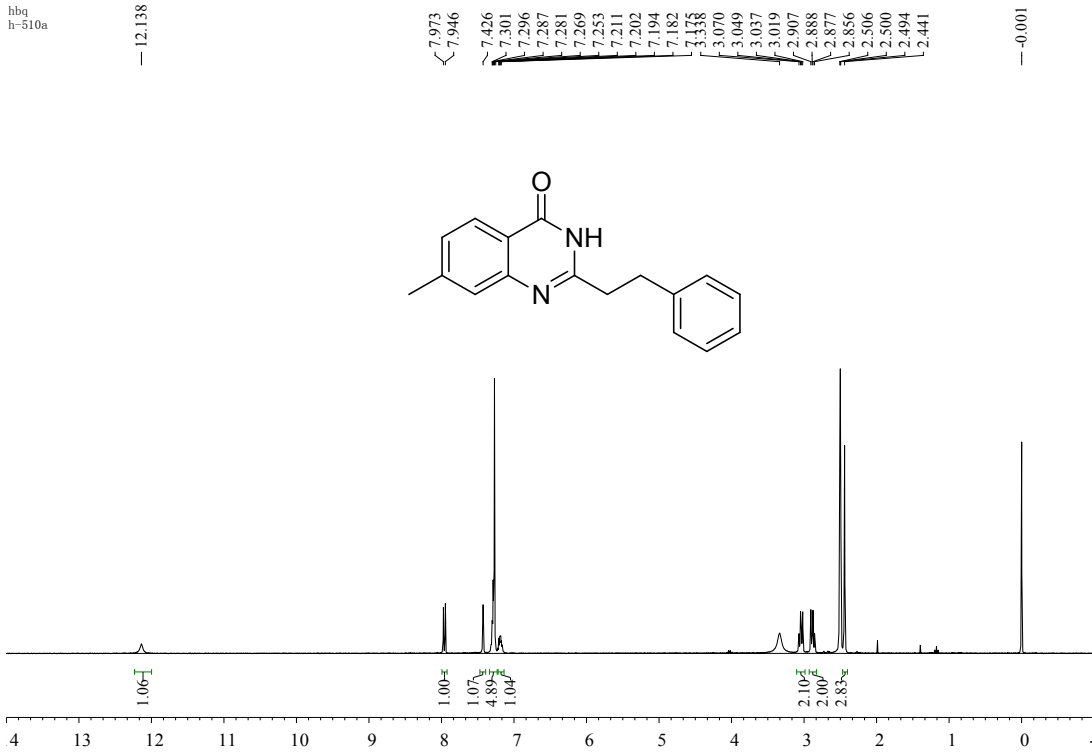

151216  
h-509

162.153  
157.097  
149.404  
145.239  
141.239  
128.836  
128.823  
127.928  
126.554  
118.888  
40.809  
40.531  
40.253  
39.975  
39.697  
39.418  
39.141  
36.742  
32.909  
21.824

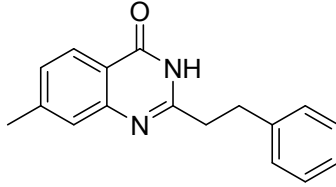

180 160 140 120 100 80 60 40 20 0

151218  
H-512A

8.455  
7.827  
7.799  
7.592  
7.584  
7.445  
7.438  
7.416  
7.409  
7.377  
7.293  
7.277  
7.269  
7.253  
7.248  
7.226  
7.203  
7.180  
4.881  
4.865  
4.848  
3.340  
2.755  
2.742  
2.506  
2.500  
2.495  
1.983  
1.964  
1.948  
1.937  
1.930  
-0.007

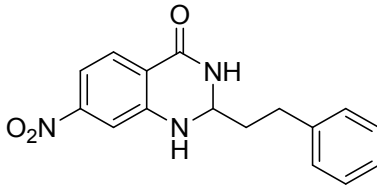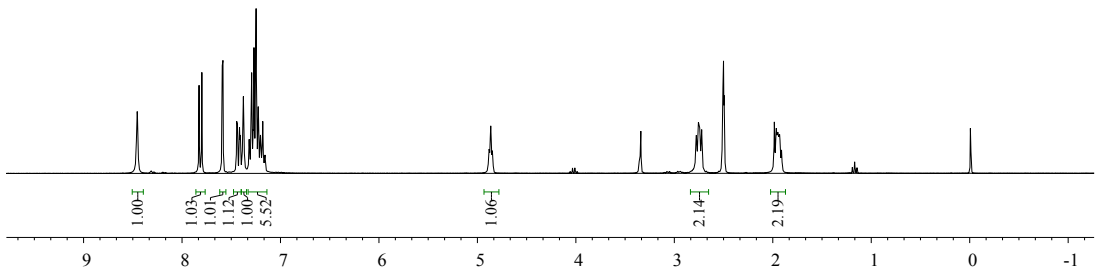

151218  
H-512A

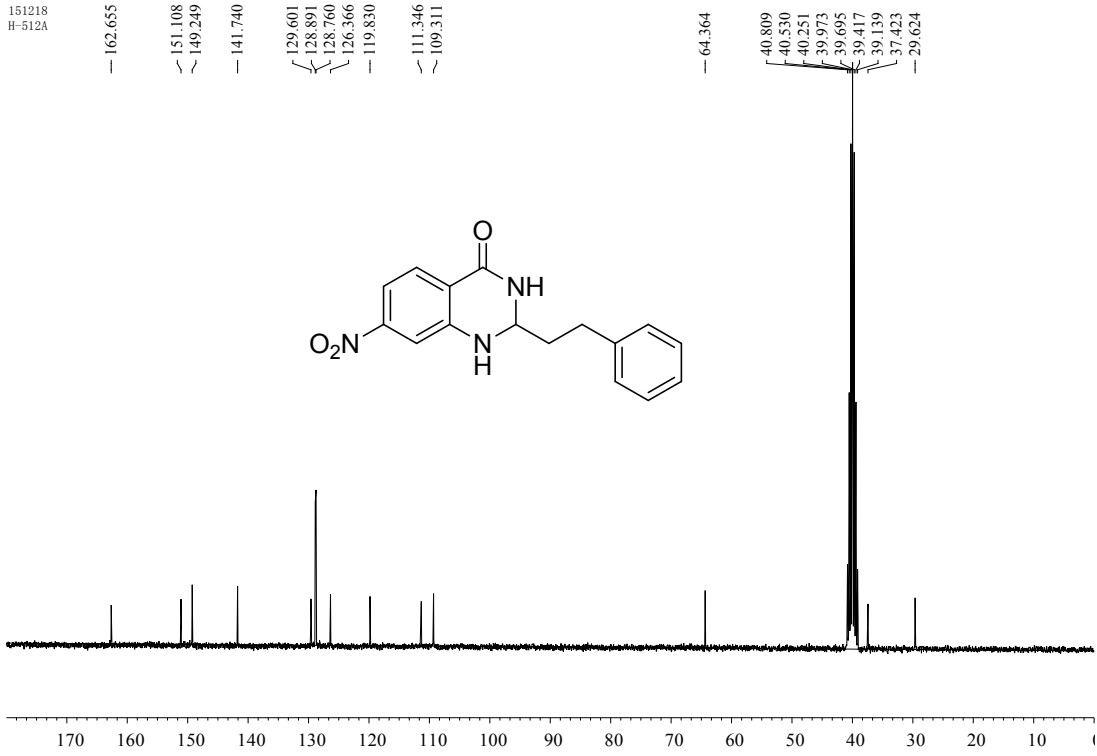

nmr  
1H NMR  
wang lixia

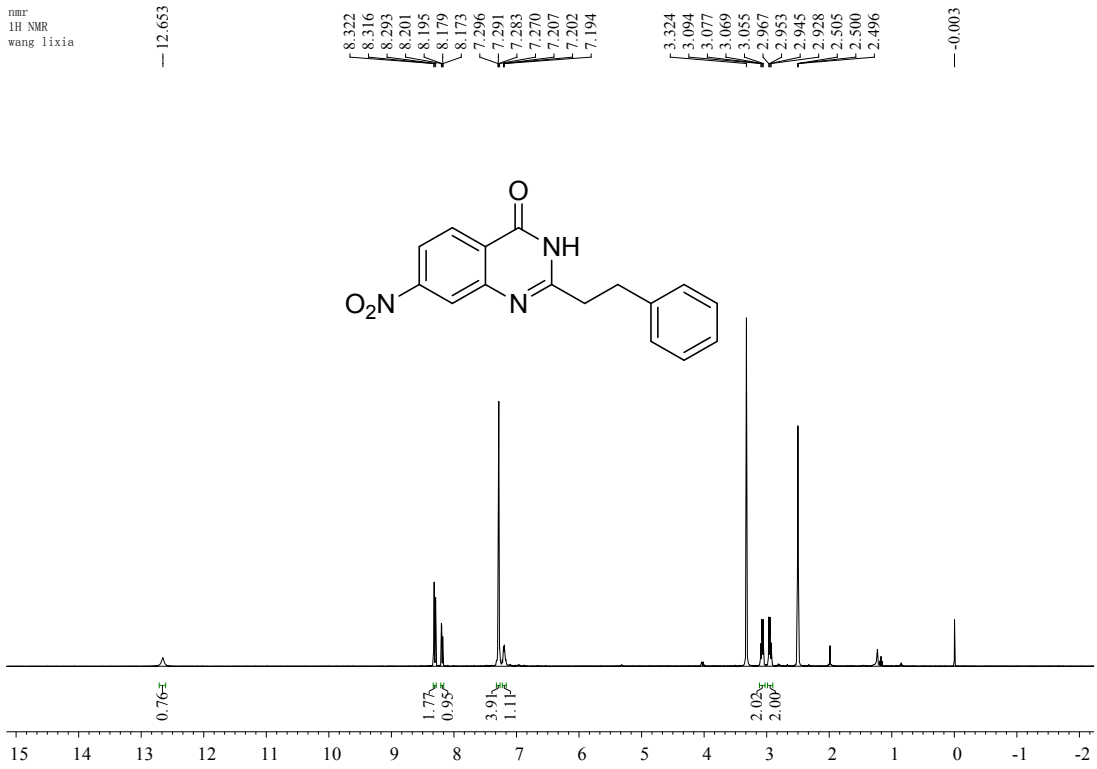

cuijie  
13C NMR  
wang lixia

~ 161.275  
~ 159.704  
~ 151.682  
~ 149.705  
— 141.006  
128.880  
128.822  
128.549  
126.633  
125.692  
122.249  
120.180

40.622  
40.413  
40.204  
39.996  
39.787  
39.578  
39.370  
36.783  
32.731

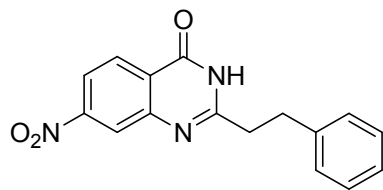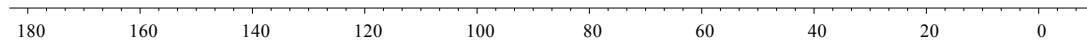

Supplement: c6ra05777b1.pdf [file c6ra05777b1.pdf]
